# Supplementary material for: Playground lead levels in rubber, soil, sand, and mulch surfaces in Boston
Source: PLoS One. 2019 Apr 25;14(4):e0216156. doi: 10.1371/journal.pone.0216156 (PMC6483242; doi:10.1371/journal.pone.0216156)
Supplement: S1 File — Demographic data, sampled concentrations, and observations for the 28 playgrounds sampled in Boston, MA, USA. (CSV) [file pone.0216156.s001.csv]

	PlaygroundID	SampleID	SampleType	avgPb	avgAs	avgZn	avgSr	avgCd	Year.Built	Sampling.Date	Sampling.Time	Wet	Peeling.Paint	Plastic.Toys	CrumbRubber.Type	Rubber.Condition	Number.Homes	Number.Homes.Paint	Taken.On.Site	SES	Distance.Road	EJ.Criteria	Notes	Units	EJcrit
1	h15	h15-mulch	mulch	8.24875	5.1075	129.98	23.53	5.00625	NA	10/29/2017	2:47 PM	1	0	1	3	2	1	0	0	high	73.14203151	0		ppm	none
2	h15	h15-rubber	rubber	45.39	7.76625	9722.78	57.545	6.4575	NA	10/29/2017	2:47 PM	1	0	1	3	2	1	0	0	high	81.73490269	0	Some damaged sections of rubber	ppm	none
3	h15	h15-soil	soil	336.6	34.64875	627.575	114.08	8.715	NA	10/29/2017	2:47 PM	1	0	1	3	2	1	0	0	high	87.05013057	0		ppm	none
4	h20	h20-rubber	rubber	13.4075	5.745	16312.205	90.43	7.245	NA	11/28/2017	1:38 PM	0	0	1	3	0	2	0	1	high	99.04873875	0		ppm	none
5	h20	h20-sand	sand	13.64	10.26625	20.83	95.4	9.3225	NA	11/28/2017	1:38 PM	0	0	1	3	0	2	0	0	high	99.04873875	0	outside box	ppm	none
6	h20	h20-soil	soil	40.615	44.62625	46.135	107.505	8.805	NA	11/28/2017	1:38 PM	0	0	1	3	0	2	0	0	high	99.04873875	0		ppm	none
7	h3	h3-mulch	mulch	13.715	5.278125	34.45	22.24	4.918125	NA	11/28/2017	3:20 PM	0	0	0	3	0	3	1	0	high	61.6037966	0		ppm	none
8	h3	h3-rubber	rubber	27.105	6.93	7884.785	77.19	8.46375	NA	11/28/2017	3:20 PM	0	0	0	3	0	3	1	1	high	61.6037966	0		ppm	none
9	h3	h3-soil	soil	46.775	7.5675	195.375	71.915	7.21125	NA	11/28/2017	3:20 PM	0	0	0	3	0	3	1	0	high	61.6037966	0	fence has peeling paint	ppm	none
10	h32	h32-mulch	mulch	5.596875	4.29	14.261875	10.9875	4.7325	NA	11/5/2017	3:10 PM	0	0	0	0	0	0	0	0	high	82.20760483	0	lot of paint from bench, maybe	ppm	none
11	h32	h32-sand	sand	7.245	5.71875	14.835	56.9	9.81	NA	11/5/2017	3:10 PM	0	0	0	0	0	0	0	0	high	82.20760483	0		ppm	none
12	h32	h32-soil	soil	21.38875	6.5475	64.765	61.65	7.9575	NA	11/5/2017	3:10 PM	0	0	0	0	0	0	0	0	high	82.20760483	0		ppm	none
13	h35	h35-rubber	rubber	16.0505	6.6405	17594.494	31.838	7.3095	1990	11/5/2017	2:00 PM	0	1	0	3	2	1	0	0	high	27.47603969	0	rubber damaged at corner	ppm	none
14	h35	h35-sand	sand	7.0275	5.65875	14.1225	36.865	9.70875	1990	11/5/2017	2:00 PM	0	1	0	3	2	1	0	0	high	27.47603969	0	baseball field	ppm	none
15	h35	h35-soil	soil	179.7	14.82	151.25	83.055	8.7	1990	11/5/2017	2:00 PM	0	1	0	3	2	1	0	0	high	27.47603969	0		ppm	none
16	h36	h36-mulch	mulch	26.149375	6.384375	74.405	13.965	4.91625	NA	11/5/2017	3:40 PM	0	1	0	3	1	2	0	0	high	116.2387397	3	crumb rubber contamination	ppm	some
17	h36	h36-rubber	rubber	19.34	6.21	4503.065	59.765	7.8975	NA	11/5/2017	3:40 PM	0	1	0	3	1	2	0	0	high	116.2387397	3	soil type under turf	ppm	some
18	h36	h36-sand	sand	22.975	7.13625	32.515	125.64	9.36375	NA	11/5/2017	3:40 PM	0	1	0	3	1	2	0	0	high	116.2387397	3	baseball field	ppm	some
19	h36	h36-soil	soil	46.33	8.1	89.585	96.345	8.6925	NA	11/5/2017	3:40 PM	0	1	0	3	1	2	0	0	high	116.2387397	3	next to fence	ppm	some
20	h37	h37-rubber	rubber	16.915	7.785	302.125	237.415	8.6025	NA	11/5/2017	3:30 PM	0	1	0	3	1	4	0	0	high	78.28511544	0		ppm	none
21	h37	h37-soil	soil	134.57	12.80625	130.415	118.345	9.43125	NA	11/5/2017	3:30 PM	0	1	0	3	1	4	0	0	high	78.28511544	0	next to tree	ppm	none
22	h39	h39-rubber	rubber	6.76875	5.44125	12962.815	24.14	7.79625	NA	11/28/2017	10:55 AM	0	0	1	3	0	1	0	0	high	29.97885299	0		ppm	none
23	h39	h39-sand	sand	6.0975	5.01	9.6375	29.43	9.5625	NA	11/28/2017	10:55 AM	0	0	1	3	0	1	0	0	high	29.97885299	0	baseball field	ppm	none
24	h39	h39-soil	soil	25.56375	3321.76375	265.3	53.22	7.1475	NA	11/28/2017	10:55 AM	0	0	1	3	0	1	0	0	high	29.97885299	0		ppm	none
25	h7	h7-rubber	rubber	8.3475	6.72	94.39	270.995	10.28625	NA	11/28/2017	NA	0	0	1	3	0	0	0	1	high	141.9017111	0		ppm	none
26	h7	h7-soil	soil	117.635	13.1775	132.3	165.43	8.74875	NA	10/29/2017	3:50 PM	1	0	1	3	0	0	0	0	high	141.9017111	0		ppm	none
27	h9	h9-mulch	mulch	5.43	4.0725	50.635	8.5975	4.41375	NA	10/29/2017	3:14 PM	1	1	0	3	1	0	0	0	high	79.20638721	0		ppm	none
28	h9	h9-rubber	rubber	9.141875	5.180625	14917.765	19.4275	6.48375	NA	10/29/2017	3:14 PM	1	1	0	3	1	0	0	0	high	78.42523284	0	Deteriorating by swings	ppm	none
29	h9	h9-sand	sand	5.85375	4.7625	9.1875	36.605	9.29625	NA	10/29/2017	3:14 PM	1	1	0	3	1	0	0	0	high	27.85683564	0		ppm	none
30	h9	h9-soil	soil	83.52	23.71	169.71	97.355	8.35125	NA	10/29/2017	3:14 PM	1	1	0	3	1	0	0	0	high	82.11020056	0		ppm	none
31	l10	l10-rubber	rubber	6.60375	5.37375	10435.85	277.215	7.87125	NA	11/5/2017	12:40 PM	0	0	0	3	0	0	0	0	low	21.41018279	2		ppm	some
32	l10	l10-sand	sand	7.65375	6.01875	24.785	39.7	9.2175	NA	11/5/2017	12:40 PM	0	0	0	3	0	0	0	0	low	21.41018279	2	baseball field	ppm	some
33	l10	l10-soil	soil	53.87	9.37875	96.505	100.945	8.03625	NA	11/5/2017	12:40 PM	0	0	0	3	0	0	0	0	low	21.41018279	2	rear bank	ppm	some
34	l13	l13-mulch	mulch	5.5725	4.2	52.46	10.1025	4.760625	NA	11/28/2017	1:05 PM	0	0	0	3	1	0	0	0	low	150.6305725	0		ppm	none
35	l13	l13-rubber	rubber	6.97125	5.47125	12584.79	184.93	7.74	NA	11/28/2017	1:05 PM	0	0	0	3	1	0	0	0	low	150.6305725	0		ppm	none
36	l13	l13-sand	sand	9.92125	6.21375	24.4	73.28	9.795	NA	11/28/2017	1:05 PM	0	0	0	3	1	0	0	0	low	150.6305725	0	adjacent field	ppm	none
37	l13	l13-soil	soil	29.8	7.0425	59.315	79.515	8.27625	NA	11/28/2017	1:05 PM	0	0	0	3	1	0	0	0	low	150.6305725	0		ppm	none
38	l2	l2-mulch	mulch	10.154375	5.2125	24.7375	18.99	5.338125	NA	11/28/2017	12:47 PM	0	0	0	3	0	2	0	0	low	176.5418891	1	big pot of mulch outside playground	ppm	some
39	l2	l2-rubber	rubber	43.995	8.39625	12558.89	45.51	7.36875	NA	11/28/2017	12:47 PM	0	0	0	3	0	2	0	0	low	176.5418891	1		ppm	some
40	l2	l2-soil	soil	78.715	11.62375	66.945	107.64	8.5125	NA	11/28/2017	12:47 PM	0	0	0	3	0	2	0	0	low	176.5418891	1		ppm	some
41	l26	l26-mulch	mulch	4.60125	3.40875	15.5775	12.4	4.52625	NA	10/29/2017	4:30 PM	1	0	0	3	0	0	0	0	low	14.03918102	2		ppm	some
42	l26	l26-rubber	rubber	7.26	5.76	395.84	180.02	9.51	NA	11/28/2017	4:30 PM	0	0	0	3	0	0	0	1	low	0.378817936	2		ppm	some
43	l26	l26-soil	soil	31.085	7.935	115	97.175	7.55625	NA	10/29/2017	4:30 PM	1	0	0	3	0	0	0	0	low	35.26526771	2		ppm	some
44	l33	l33-mulch	mulch	7.265	4.981875	85.6625	10.78	4.903125	NA	11/5/2017	12:50 PM	0	1	0	3	1	0	0	0	low	221.6882867	1	middle of playground	ppm	some
45	l33	l33-rubber	rubber	61.166875	11.989375	19019.7325	124.5625	7.4175	NA	11/5/2017	12:50 PM	0	1	0	3	1	0	0	0	low	221.6882867	1		ppm	some
46	l33	l33-soil	soil	156.57	12.53625	105.445	110.43	8.8875	NA	11/5/2017	12:50 PM	0	1	0	3	1	0	0	0	low	221.6882867	1		ppm	some
47	l5	l5-rubber	rubber	9.87625	5.52	13502.82	110.015	7.84875	1891	11/28/2017	12:10 PM	0	0	0	3	1	0	0	0	low	92.3132791	3		ppm	some
48	l5	l5-sand	sand	7.33125	5.7	25.57	58.345	8.775	1891	11/28/2017	12:10 PM	0	0	0	3	1	0	0	0	low	92.3132791	3		ppm	some
49	l5	l5-soil	soil	12.66	6.225	162.14	69.785	8.30625	1891	11/28/2017	12:10 PM	0	0	0	3	1	0	0	0	low	92.3132791	3		ppm	some
50	l51	l51-mulch	mulch	6.705	4.974375	25.3175	7.67	5.265	NA	11/5/2017	1:10 PM	0	1	0	3	1	1	0	0	low	268.5015932	1	under structure	ppm	some
51	l51	l51-rubber	rubber	8.625	5.19375	19731.965	19.215	7.3875	NA	11/5/2017	1:10 PM	0	1	0	3	1	1	0	0	low	268.5015932	1	deteriorating all over	ppm	some
52	l51	l51-soil	soil	61.47333333	9.3175	62.49666667	98.75	9.255	NA	11/5/2017	1:10 PM	0	1	0	3	1	1	0	0	low	268.5015932	1		ppm	some
53	l7	l7-mulch	mulch	18.1375	5.375625	106.0925	17.55	4.67625	NA	11/28/2017	11:55 AM	0	0	0	3	0	5	2	0	low	105.4375289	1		ppm	some
54	l7	l7-rubber	rubber	25.47	6.92625	13180.44	43.895	6.81375	NA	11/28/2017	11:55 AM	0	0	0	3	0	5	2	0	low	105.4375289	1		ppm	some
55	l7	l7-soil	soil	28.04625	611.92375	5456.24	46.85625	8.37375	NA	11/28/2017	11:55 AM	0	0	0	3	0	5	2	0	low	105.4375289	1		ppm	some
56	l9	l9-mulch	mulch	5.14125	3.875625	48.2025	7.675	4.66875	NA	11/28/2017	12:30 PM	0	1	0	3	1	1	0	0	low	3.253309611	1	wood chips	ppm	some
57	l9	l9-rubber	rubber	73.195	8.685	12540.33	88.145	6.70875	NA	11/28/2017	12:30 PM	0	1	0	3	1	1	0	0	low	3.253309611	1		ppm	some
58	l9	l9-sand	sand	6.42	6.95625	10.03875	29.355	9.4575	NA	11/28/2017	12:30 PM	0	1	0	3	1	1	0	0	low	3.253309611	1	baseball field	ppm	some
59	l9	l9-soil	soil	31.35	8.33625	54.545	90.49	8.93625	NA	11/28/2017	12:30 PM	0	1	0	3	1	1	0	0	low	3.253309611	1		ppm	some
60	m11	m11-mulch	mulch	6.8785	4.692	42.944	31.526	5.442	NA	11/12/2017	1:05 PM	0	0	1	3	2	0	0	0	medium	41.85001694	0		ppm	none
61	m11	m11-rubber	rubber	5.955	4.76625	8954.57	107.355	6.64875	NA	11/12/2017	1:05 PM	0	0	1	3	0	0	0	0	medium	41.85001694	0	squishy rubber	ppm	none
62	m11	m11-soil	soil	18.155	8.35	72.675	79.205	6.84	NA	11/12/2017	1:05 PM	0	0	1	3	2	0	0	0	medium	41.85001694	0		ppm	none
63	m12	m12-mulch	mulch	6.294375	4.651875	39.96	11.41	5.784375	NA	11/12/2017	2:30 PM	0	1	0	3	1	0	0	0	medium	39.25415322	1		ppm	some
64	m12	m12-rubber	rubber	13.21	5.88375	21885.82	14.445	6.58125	NA	11/12/2017	2:30 PM	0	1	0	3	1	0	0	0	medium	39.25415322	1		ppm	some
65	m12	m12-sand	sand	6.02625	4.995	11.83375	12.86	21.365	NA	11/12/2017	2:30 PM	0	1	0	3	1	0	0	0	medium	39.25415322	1		ppm	some
66	m12	m12-soil	soil	69.005	9.88125	68.87	96.955	8.98875	NA	11/12/2017	2:30 PM	0	1	0	3	1	0	0	0	medium	39.25415322	1	lot of rubber in soil	ppm	some
67	m22	m22-rubber	rubber	9.98375	4.79625	19529.55	63.62	6.07125	NA	11/28/2017	11:35 AM	0	0	0	3	1	0	0	0	medium	24.65868739	1		ppm	some
68	m22	m22-soil	soil	37.605	7.905	152.12	64.995	8.59125	NA	11/28/2017	11:35 AM	0	0	0	3	1	0	0	0	medium	24.65868739	1		ppm	some
69	m25	m25-rubber	rubber	53.235	26.50625	1417.17	130.85	8.43375	NA	11/28/2017	NA	0	0	0	3	0	0	0	1	medium	17.94171083	1		ppm	some
70	m25	m25-soil	soil	19.075	10.07875	60.49	74.765	7.66125	NA	10/29/2017	1:50 PM	1	0	0	3	0	0	0	0	medium	17.94171083	1		ppm	some
71	m26	m26-rubber	rubber	66.745	10.4175	1957.055	59.76	9.76125	1970	11/28/2017	NA	0	0	1	3	0	0	0	1	medium	100.1907526	0	Fence peeling paint	ppm	none
72	m26	m26-sand	sand	6.61875	5.05875	10.44375	23.36	8.9325	1970	10/29/2017	1:20 PM	0	0	1	3	0	0	0	0	medium	100.1907526	0		ppm	none
73	m26	m26-soil	soil	17.0975	6.1125	49.65	76.37	7.6725	1970	10/29/2017	1:20 PM	1	0	1	3	0	0	0	0	medium	101.6808966	0		ppm	none
74	m3	m3-mulch	mulch	5.885625	4.408125	52.885	12.6225	4.543125	NA	11/12/2017	1:57 PM	0	1	1	3	1	1	0	0	medium	223.0547435	1		ppm	some
75	m3	m3-rubber	rubber	11.68	5.4975	14797.63	111.375	6.46125	NA	11/12/2017	1:57 PM	0	1	1	3	1	1	0	0	medium	223.0547435	1	rubber deteriorating near swings	ppm	some
76	m3	m3-sand	sand	6.99375	5.46375	9.27375	66.055	9.2325	NA	11/12/2017	1:57 PM	0	1	1	3	1	1	0	0	medium	223.0547435	1		ppm	some
77	m3	m3-soil	soil	41.77	8.50875	49.765	108.23	8.7075	NA	11/12/2017	1:57 PM	0	1	1	3	1	1	0	0	medium	223.0547435	1	rust on fence	ppm	some
78	m32	m32-rubber	rubber	9.27375	5.4	16174.105	90.885	7.3125	1976	10/29/2017	12:45 PM	1	1	1	3	2	0	0	0	medium	28.23941091	1	Some cracks	ppm	some
79	m32	m32-sand	sand	7.48125	6.28125	38.385	51.185	9.09	1976	10/29/2017	12:45 PM	1	1	1	3	2	0	0	0	medium	34.07698273	1	Sampled close to digger	ppm	some
80	m32	m32-soil	soil	54.1425	8.3625	50.385	62.9	8.93625	1976	10/29/2017	12:45 PM	1	1	1	3	2	0	0	0	medium	44.70378639	1		ppm	some
81	m5	m5-rubber	rubber	8.67625	5.235	14762.575	90.68	6.7575	NA	11/12/2017	1:35 PM	0	0	0	3	0	0	0	0	medium	127.8466425	1		ppm	some
82	m5	m5-soil	soil	41.93	8.71125	39.76	74.455	8.50875	NA	11/12/2017	1:35 PM	0	0	0	3	0	0	0	0	medium	127.8466425	1		ppm	some
83	m8	m8-rubber	rubber	8.835833333	5.1325	16163.42	26.09	6.32	NA	11/12/2017	2:10 PM	0	1	0	3	2	1	0	0	medium	101.5507743	1	rubber only bad near swings	ppm	some
84	m8	m8-sand	sand	6.59625	5.32875	13.82125	16.08875	14.7075	NA	11/12/2017	2:10 PM	0	1	0	3	2	1	0	0	medium	101.5507743	1	baseball field	ppm	some
85	m8	m8-soil	soil	23.41	7.36125	57.025	79.09	8.7525	NA	11/12/2017	2:10 PM	0	1	0	3	2	1	0	0	medium	101.5507743	1	rust on fence	ppm	some
